# Supplementary material for: A high-index facet gold 12 tip nanostar for an improved electrocatalytic alcohol oxidation reaction with superior CO tolerance
Source: Royal Society of Chemistry journal article supplement (doi:10.1039/d3nr01645e), 2023-01-01
Supplement: d3nr01645e1.pdf [file d3nr01645e1.pdf]

## Supporting Information

### High-Index Facet Gold 12 tip Nanostars for an Improved Electrocatalytic Alcohol Oxidation with Superior CO-tolerance

*Sanjeevan Rajagopal, Suresh Thangudu and Kuo Chu Hwang\**

Department of Chemistry, National Tsing Hua University, Hsinchu 30013, Taiwan, R.O.C.

\*E-mail: [kchwang@mx.nthu.edu.tw](mailto:kchwang@mx.nthu.edu.tw)

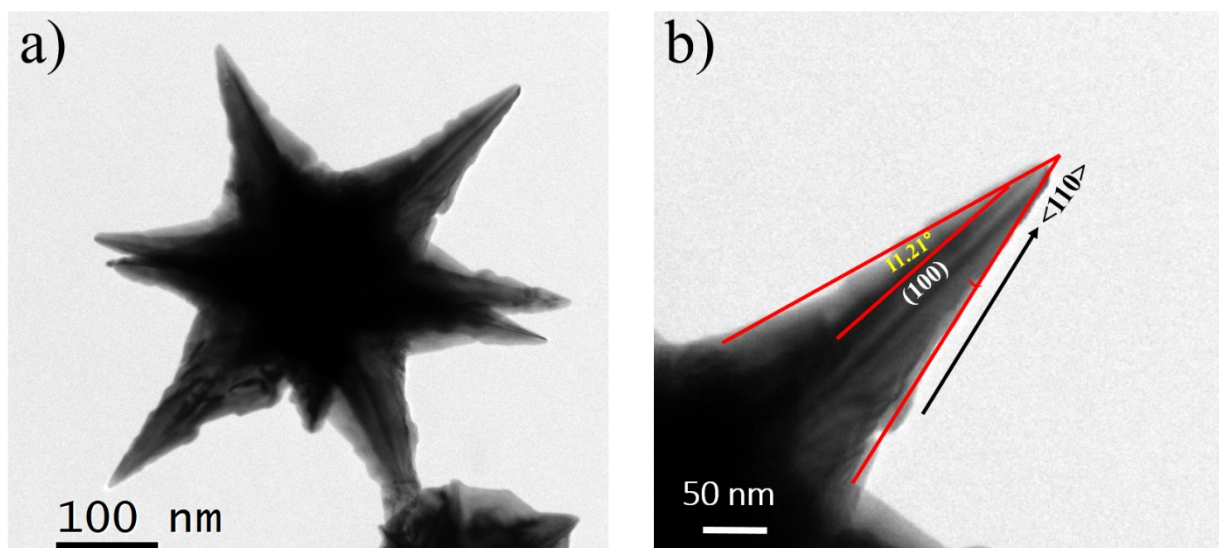

**Figure S1.** Au 12 tip nanostars. a) TEM image of a single nanoparticle. b) TEM images are taken from a single tip of the Au 12-tips nanostar shown in (a).

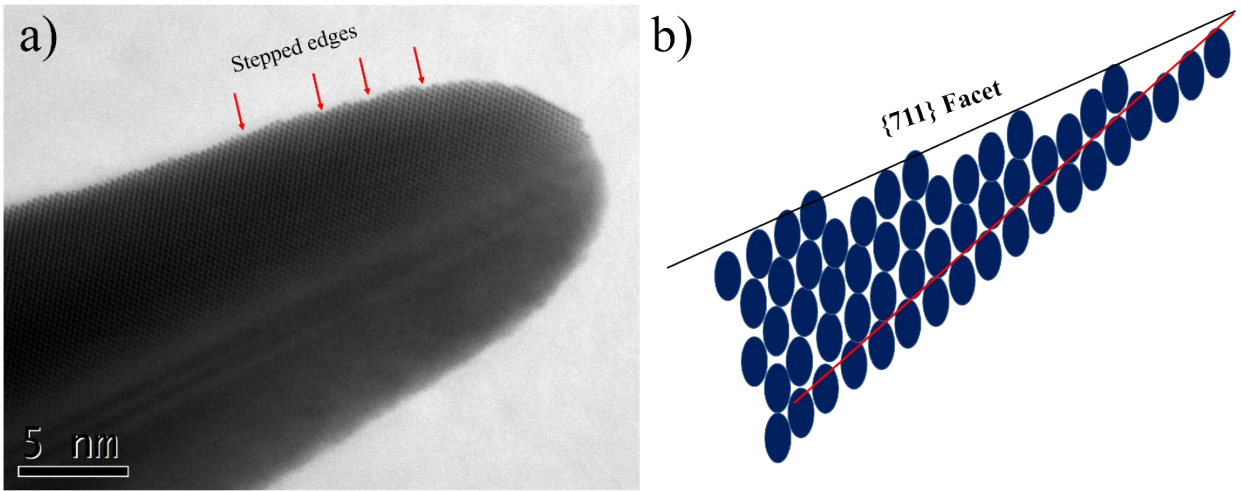

**Figure S2.** Au 12 tip nanostars. a) HRTEM images of the branches clearly illustrating the highly stepped edges. b) The theoretical atomic model of the {711} planes projected from the  $[-1, 1, 1]$  and  $[-1, 1, 0]$  zone axis and showing the (100) terraces and (111) steps.

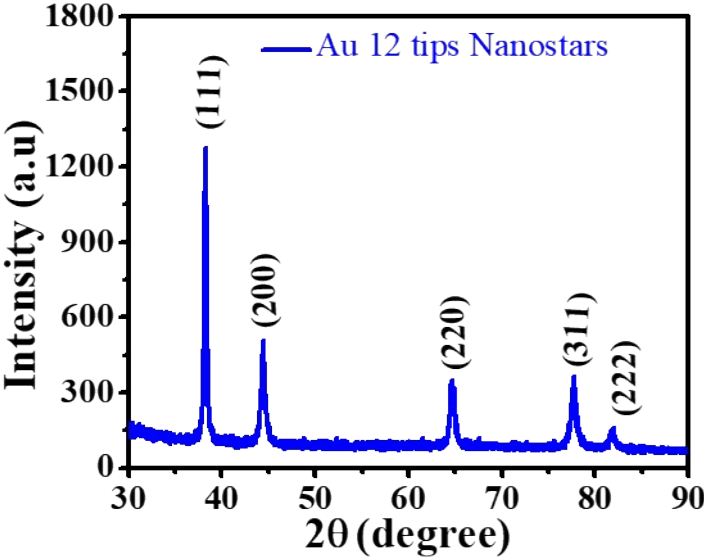

**Figure S3.** XRD pattern for Au 12 tips nanostructure.

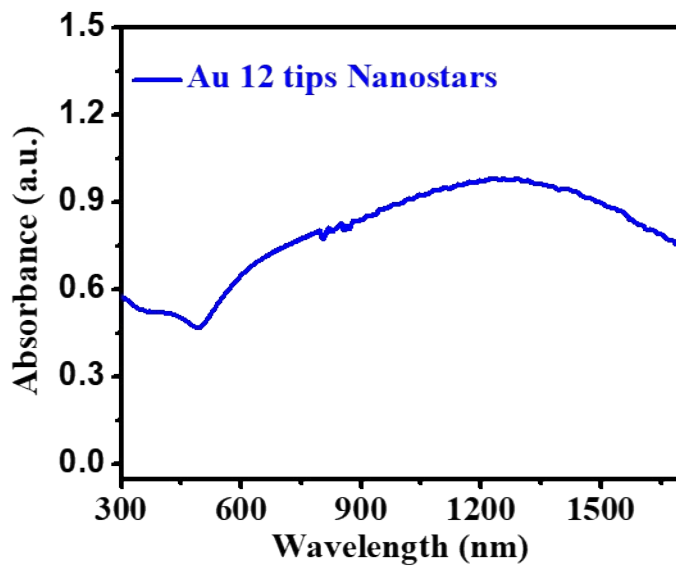

**Figure S4.** UV-Visible-NIR absorption spectrum of Au 12 tip nanostructure.

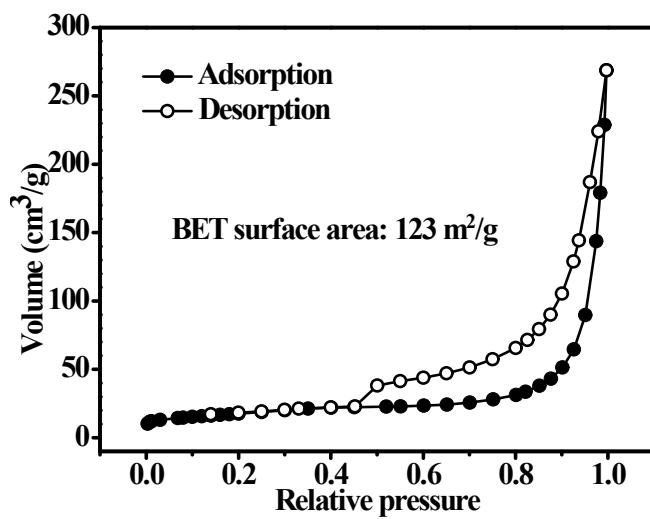

**Figure S5.** BET adsorption-desorption analysis of as synthesized Au 12 tips nanostars.

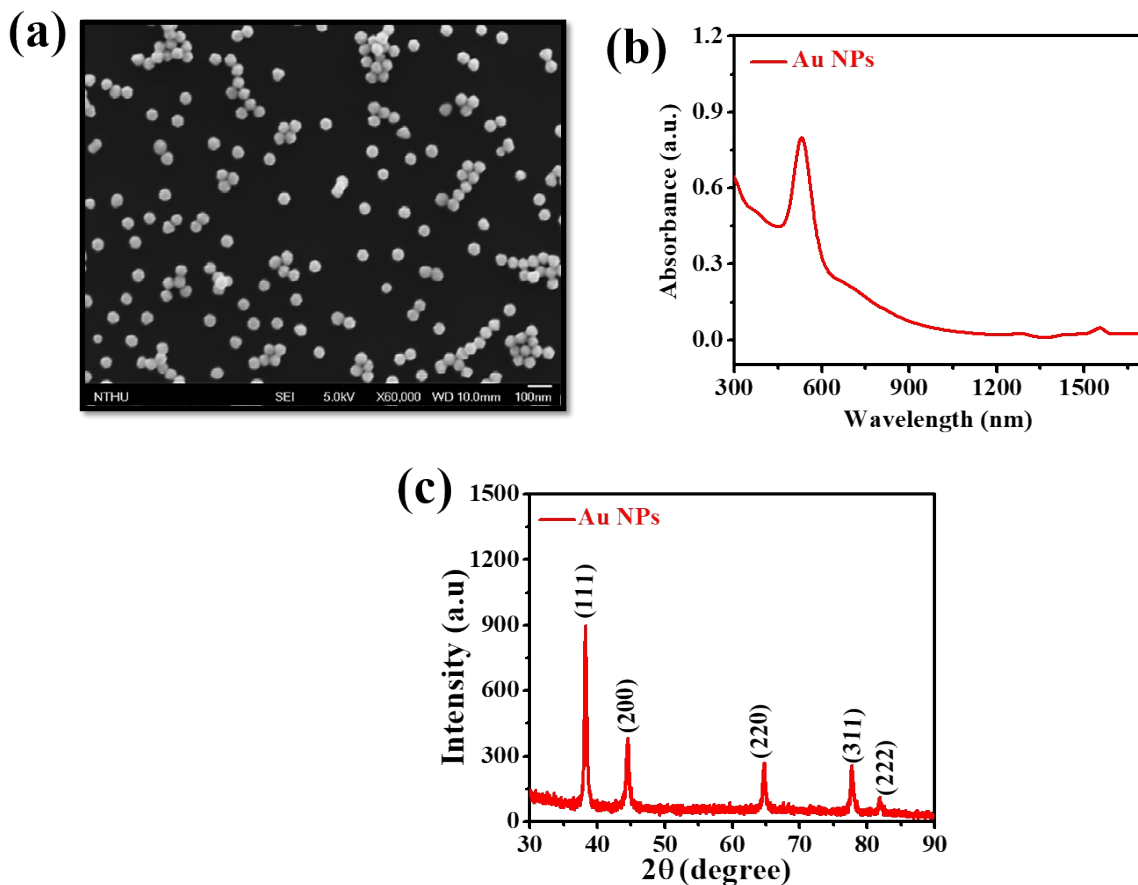

**Figure S6.** Characterization of Au NPs. (a) SEM image for Au NPs. (b) absorption spectra and (c) XRD of Au NPs.

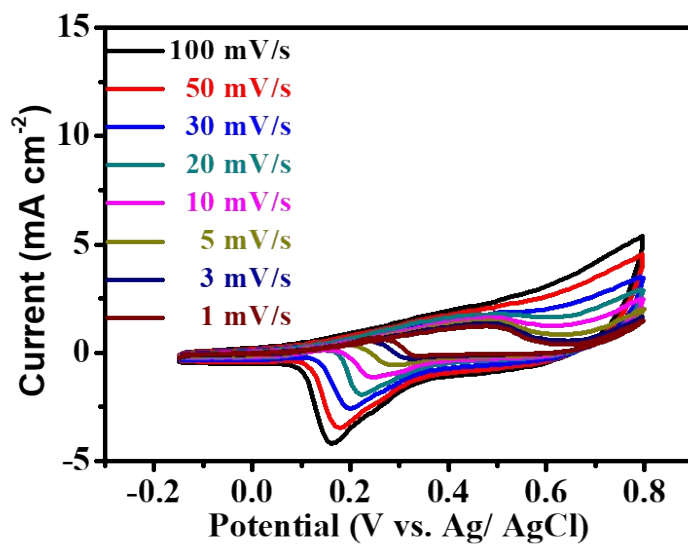

**Figure S7.** Cyclic voltammetry curves at a different scan rate effect with Au NPs, 0.5 M KOH, and 2 M methanol.

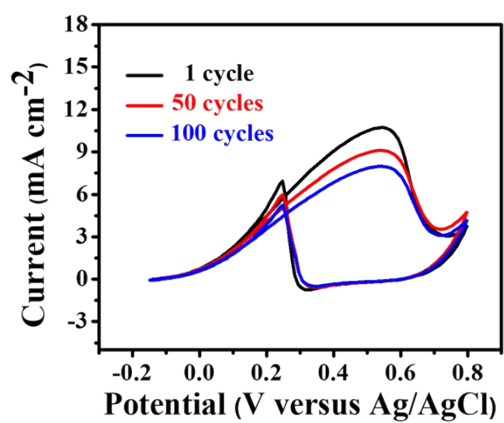

**Figure S8.** Electrocatalytic cycles in 0.5 M KOH electrolyte solution and 2 M methanol at a scan rate of 3 mVs<sup>-1</sup> for 1- 100 cycles.

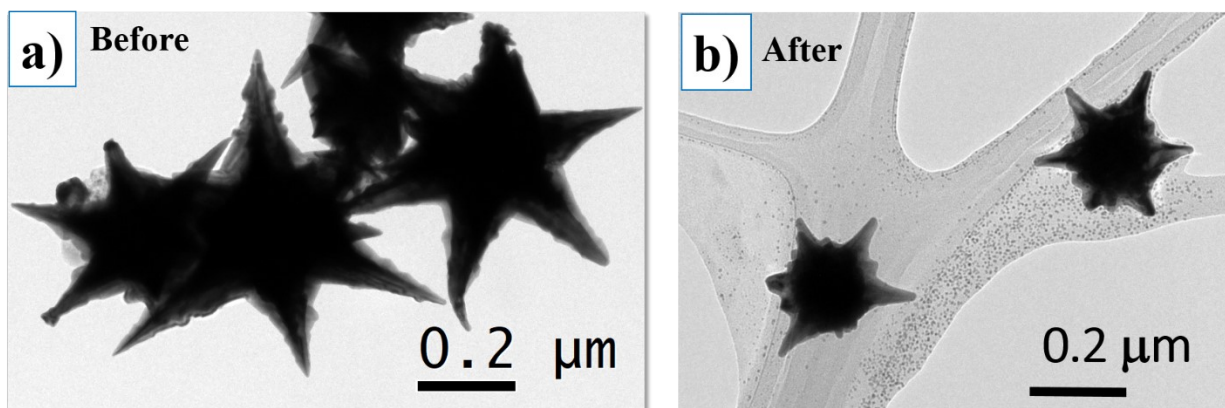

**Figure S9.** TEM images for Au 12 tips (a) Before the catalytic performance and (b) after catalytic performance.

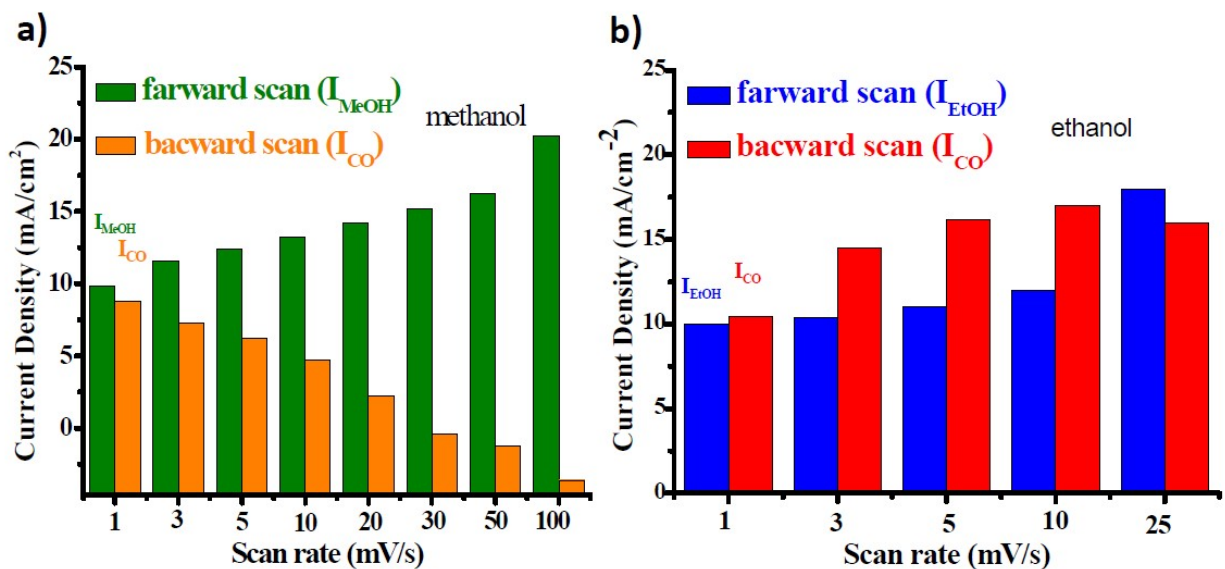

**Figure S10.** Forward and backward scan current densities for (a) methanol and (b) ethanol oxidations on Au 12 tips nanostars electrode, forward peak ( $I_f$ ), backward peak ( $I_b$ ).

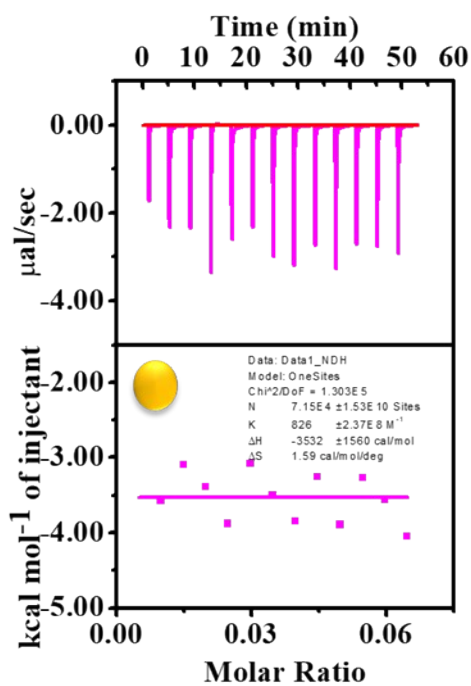

**Figure S11.** Isothermal titration calorimetry (ITC) titration curves on Au NPs electrode.

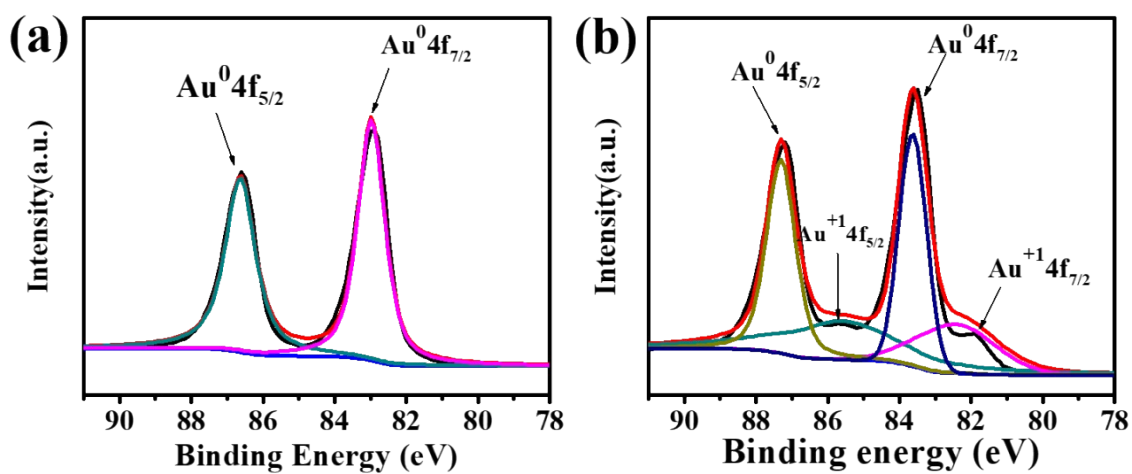

**Figure S12.** XPS spectra of Au 12 tip nanostars: a) before methanol oxidation reaction, and b) after methanol oxidation.

**Table S1.** Projection angles between (100) and (h11) facets.

| Angle with {100} | 55°   | 35°   | 25°   | 19°   | 15°   | 13°   | 11°   |
|------------------|-------|-------|-------|-------|-------|-------|-------|
| {h11}            | {111} | {211} | {311} | {411} | {511} | {611} | {711} |

**Table S2.** Summary of decreases in electrocatalytic activities of metal nanostructures for recently reported alcohol oxidation reaction.

| <b>Electrocatalysis</b>                         | <b>No. of Cycles</b> | <b>Scan Speed<br/>mV s<sup>-1</sup></b> | <b>Catalysis<br/>decrease %</b> | <b>Reference</b>    |
|-------------------------------------------------|----------------------|-----------------------------------------|---------------------------------|---------------------|
| PtCu nanocubes                                  | 50                   | 25                                      | 22.9                            | S1                  |
| Pd-WO <sub>2</sub> .Nanosheets                  | 50                   | 50                                      | 21.1                            | S2                  |
| Pd-Ni alloy NPs                                 | 50                   | 50                                      | 25.3                            | S3                  |
| NiCo <sub>2</sub> O <sub>4</sub><br>Nanoflowers | 500                  | 5                                       | 50                              | S4                  |
| Pt/C nanostructures                             | 100                  | 50                                      | 80                              | S5                  |
| Pt -Au NPs                                      | 7                    | 10                                      | 85                              | S6                  |
| <b>Au 12 tips<br/>nanostars</b>                 | <b>50</b>            | <b>3</b>                                | <b>19</b>                       | <b>Present work</b> |
| <b>Au 12 tips<br/>nanostars</b>                 | <b>100</b>           | <b>3</b>                                | <b>33</b>                       | <b>Present work</b> |



**Table S3. Summary of ECSA and TOF values for recently reported electrocatalysts in methanol oxidation reaction**

| <b>Electrocatalysis</b>                               | <b>Electrochemically Active Surface Area (ECSA) (m<sup>2</sup> g<sup>-1</sup>)</b> | <b>The turnover frequency (TOF) (s<sup>-1</sup>)</b> | <b>Reference</b>    |
|-------------------------------------------------------|------------------------------------------------------------------------------------|------------------------------------------------------|---------------------|
| GC/Pd-PNMSS                                           | 29.15                                                                              | 0.0018                                               | S7                  |
| <b>Au NPs</b>                                         | <b>0.50</b>                                                                        | <b>0.0098</b>                                        | <b>Current work</b> |
| CuO/Co(OH) <sub>2</sub><br>Nanosheets                 | 8.5                                                                                | 0.255                                                | S8                  |
| <b>Au 12 tip nanostars</b>                            | <b>0.631</b>                                                                       | <b>0.480</b>                                         | <b>Current work</b> |
| Pd <sub>6</sub> Ru <sub>4</sub> /TiO <sub>2</sub> NPs | 210                                                                                | 0.82                                                 | S9                  |
| Au-Pt alloy NPs                                       | 113                                                                                | 0.89                                                 | S10                 |
| Pt cubic nanoboxes                                    | 1.10                                                                               | 0.89                                                 | S11                 |
| Pt-Bi bimetallic NPs                                  | 539                                                                                | 1.37                                                 | S12                 |

**Table S4. Summary of ECSA and TOF values for recently reported electrocatalysts in ethanol oxidation reaction.**

| <b>Electrocatalysis</b>      | <b>Electrochemically Active Surface Area (ECSA) (m<sup>2</sup> g<sup>-1</sup>)</b> | <b>The turnover frequency (TOF) (atom<sup>-1</sup> s<sup>-1</sup>)</b> | <b>Reference</b>    |
|------------------------------|------------------------------------------------------------------------------------|------------------------------------------------------------------------|---------------------|
| Pd/C                         | 21.1                                                                               | 0.20                                                                   | S13                 |
| Hexagonal Pd/CNS             | 31.1                                                                               | 0.24                                                                   | S14                 |
| Pd/RGO                       | 19.5                                                                               | 0.33                                                                   | S15                 |
| Pd-nitrogen-doped graphene   | 28.1                                                                               | 0.33                                                                   | S13                 |
| Pd-polyaniline nanoparticles | 66.0                                                                               | 0.36                                                                   | S16                 |
| <b>Au 12 tip nanostars</b>   | <b>6.31</b>                                                                        | <b>0.45</b>                                                            | <b>Current work</b> |
| Pd/IL-RGO                    | 23.6                                                                               | 0.58                                                                   | S15                 |

### Supporting references

- S1. Y. Yang, Y. Guo, C. Fu, R. Zhang, W. Zhan, P. Wang, X. Zhang, Q. Wang and X. Zhou, *J. Colloid Interface Sci.*, 2021, **595**, 107–117.
- S2. L. Karuppasamy, C. Y. Chen. S. Anandan, S. and J, J, Wu, *ACS Applied Materials & Interfaces*, 2019, **11**, 10028-10041.
- S3. Sankar, G. M. Anilkumar, T. Tamaki and T. Yamaguchi, *ChemCatChem*, 2019, **11**, 4731–4737.
- S4. A, Y, Faid. H, Ismail, *ChemistrySelect*, 2019, **4**, 7896-7903.
- S5. P. Mehdipour, A. Omrani, H. Rostami and A. A. Rostami, *J. Mol. Liq.*, 2016, **219**, 165–172.

- S6. Y. Liu, Y. Zeng, R. Liu, H. Wu, G. Wang and D. Cao, *Electrochim. Acta*, 2012, **76**, 174-178.
- S7. F. Kaedi, Z. Yavari, M. Noroozifar and H. Saravani, *J. Electroanal. Chem.*, 2018, **827**, 204–212.
- S8. L. Chen, Z. Hua, J. Shi and M. He, *ACS Appl. Mater. Interfaces*, 2018, **10**, 39002–39008.
- S9. Y. Zheng, F. Chen, X. Liu, X. Guo, Y. Ying, Y. Wu, Y. Wen and H. Yang, *J. Power Sources*, 2020, **472**, 228517.
- S10. W. Ye, H. Kou, Q. Liu, J. Yan, F. Zhou and C. Wang, *Int. J. Hydrogen Energy*, 2012, **37**, 4088–4097.
- S11. Z. Peng, H. You, J. Wu and H. Yang, *Nano Lett.*, 2010, **10**, 1492–1496.
- S12. Y. Xiao, Y. Wang and A. Varma, *J. Catal.*, 2018, **363**, 144–153.
- S13. S. Li, J. Shu, S. Ma, H. Yang, J. Jin, X. Zhang and R. Jin, *Applied Catalysis B: Environmental*, 2021, **280**, 119464.
- S14. L. Karupppasamy. G, J, Lee, S. Anandan and J, J, Wu. *Applied Surface Science*, 2020, **519**, 146266.
- S15. S, Li. X, Liang. S, Shen, H. Yang, and C.M.L, Wu. *Inorganic Chemistry*, 2021, **60**, 17388-17397.
- S16. R, V, Jagadeesh, and V, Lakshminarayanan, *Applied Catalysis B: Environmental*, 2019, **251**, 25-36.
